# Supplementary material for: Impact of TKI Switching, Reduction, and Discontinuation on Cardiovascular Events in cml patients
Source: Research Square preprint supplement (doi:10.21203/rs.3.rs-3632503/v1), 2023-11-26
Supplement: Supplementary file 1 [file 36ab5430719f957b557e9e3c.xlsx]

## Sheet: Table 1
	Table 1.Definition of cardiovascular events and types of TKI in each treatment line
	A. Definition of cardiovascular events				B. Types of TKI in each treatment line
	Examination	Parameter			Treatment line		Number of patients	Median duration of TKI treatment
								(months, range)
	UCG	Mild left ventricular hypertrophy			1st line TKI (n=63)
	abnormalities	Left atrial enlargement				Imatinib	33	95 (1-227)
		Hemopericardium				Nilotinib	15	24 (1-96)
		Left ventricular hypertrophy				Dasatinib	12	11 (1-80)
		Cardiomegaly				Bosutinib	3	3 (1-4)
		Old myocardial infarction			2nd line TKI (n=36)
	ECG abnormalities	QTc prolongation				Imatinib	4	24 (4-28)
		ST segment elevation				Nilotinib	13	41 (1-113)
		T-wave abnormality				Dasatinib	11	20 (1-135)
		R-wave progression				Bosutinib	7	24 (1-31)
		ST depression				Ponatinib	1	7.5
		Left ventricular dilatation			3rd line TKI (n=15)
		Left ventricular hypertrophy				Imatinib	6	7 (1-40)
		Nonspecific ST and T wave change				Nilotinib	3	1 (1-28)
		Nonspecific ST segment elevation				Dasatinib	2	3 (2-5)
		Nonspecific T wave abnormalities				Bosutinib	3	11 (2-13)
	Increase of TRPG	≧ 30mmHg				Ponatinib	1	2
	QTc prolongation	CTCAE version 4.0 : ≧ grade 3			4th line TKI (n=7)
		(QTc ≧ 500 ms)				Nilotinib	3	7 (1-100)
	High BNP levels	≧ 100 pg/mL				Dasatinib	2	6 (1-12)
	Hypertension	CTCAE version 4.0 : ≧ grade 2				Bosutinib	2	13 (1-25)
		(sBP ≧ 140 mmHg/ dBP ≧ 90 mmHg)			5th line TKI (n=3)
	Increase of CTR	≧ 50%				Bosutinib	1	2
	X-ray	Pleural effusion				Ponatinib	2	20 (1-40)
	UCG, ultrasound cardiography; ECG, electrocardiogram; TRPG, transtricuspid pressure gradient; CTR, cardiothoracic ratio; BNP, plasma brain natriuretic peptide; sBP, systolic blood pressure; dBP, diastolic blood pressure				6th line TKI (n=2)
						Nilotinib	1	43
						Ponatinib	1	5
					TKI; tyrosine kinase inhibitor
