# Supplementary material for: Impact of TKI Switching, Reduction, and Discontinuation on Cardiovascular Events in cml patients
Source: Research Square preprint supplement (doi:10.21203/rs.3.rs-3632503/v1), 2023-11-26
Supplement: Supplementary file 2 [file 4276f44223284fa38b749c81.xlsx]

## Sheet: Table 2
	Table 2. The detail of cardiovascular profile in individual 63 patients
	UPN	Underlying		CVE risk factor*	Evaluating CVE risk		The detail of CVE
		Disease	Treatment		Score2 and Score2-OP Risk Chart (%)	Suita Score(%)	Discontinuing TKI	QTc prolongation	High BNP levels	PE	Increased TRPG	UCG abnormalities	Increased CTR	ECG abnormalities	HT	Other
	1	ー	Hypoglycemic drug	DM	2	<2	Yes	ー	ー	◆	○	■	○	■	ー	Myocardiopathy■
	2	ー	ー	ー	3	<2	Yes	ー	ー	ー	ー	ー	ー	○	○
	3	ー	ー	ー	3	<2	Yes	ー	ー	ー	ー	ー	ー	ー	ー
	4	ー	ー	CKD	5	<2	Yes	ー	○	ー	ー	○	ー	ー	●
	5	Chemical ionization	antiplatelet drug	Smoker	11	2-9	Yes	ー	ー	ー	ー	ー	○	○	●	Angina pectoris◆, Ischaemic heart disease◆
	6	ー	ー	ー	5	2-9	Yes	ー	ー	◆	○	ー	ー	ー	●
	7	Chemical ionization	Antiplatelet drug, Antihypertensive drug, Lipid-lowering drug, Hypoglycemic drug	HL, HT, DM	15	>9	Yes	ー	○	○	○	○	ー	ー	○
	8	ECG abnormalities, HT	ー	Smoker, HT	3	<2	Yes	ー	ー	ー	ー	ー	ー	○	○
	9	ー	ー	Smoker	3	<2	Yes	ー	ー	ー	ー	ー	ー	○	ー
	10	ー	ー	Smoker	5	<2	Yes	ー	ー	ー	ー	ー	ー	○	ー
	11	ー	Antihypertensive drug, Lipid-lowering drug, Hypoglycemic drug, Antiplatelet drug	Smoker, HT, HL, DM	10	>9	Yes	ー	ー	ー	ー	ー	ー	ー	○
	12	Increased CTR	ー	Smoker, CKD	12	>9	Yes	ー	○	ー	○	ー	○	ー	●
	13	ー	ー	HT	7	2-9	Yes	ー	ー	ー	ー	ー	ー	○	○
	14	ー	ー	Smoker	3	<2	Yes	ー	ー	○	ー	ー	ー	○	ー
	15	Chemical ionization	Antihypertensive drug, Lipid-lowering drug, Antiplatelet drug	HT, HL	7	2-9	Yes	ー	ー	ー	ー	ー	ー	ー	○
	16	ECG abnormalities	ー	ー	11	2-9	Yes	ー	○	ー	ー	ー	ー	○	●
	17	ー	ー	Smoker	5	<2	Yes	ー	ー	◆	ー	○	○	○	○
	18	Aortic stenosis	Anticoagulant drug, lipid-lowering drug, Antihypertensive drug	ー	9	<2	Yes	ー	○	ー	○	ー	ー	ー	○
	19	ー	ー	Smoker, HT	3	<2	Yes	ー	ー	ー	ー	ー	ー	ー	○
	20	ー	ー	ー	2	<2	Yes	ー	ー	ー	ー	○	ー	○	ー
	21	HT	Antihypertensive drug	HT	6	<2	Yes	ー	ー	ー	ー	ー	ー	ー	ー
	22	ECG abnormalities	ー	Smoker	9	>9	Yes	ー	ー	▼	ー	ー	ー	○	ー
	23	ECG abnormalities, Increased CTR	ー	Smoker, HT, HL, CKD	18	>9	Yes	ー	ー	ー	ー	○	○	○	○	Angina pectoris◆
	24	Bradycardia-tachycardia syndrome, HT	Anticoagulant drug, Antihypertensive drug	Smoker, HT, CKD	16	>9	Yes	ー	ー	▼/◆	ー	ー	○	○	ー
	25	ECG abnormalities	ー	Smoker, CKD	7	2-9	No	ー	ー	ー	ー	ー	○	○	●
	26	ー	Antihypertensive drug	Smoker, HT	4	2-9	No	ー	ー	ー	○	ー	ー	○	●	Angina pectoris▼
	27	ー	ー	Smoker	1	<2	No	ー	ー	ー	ー	ー	ー	ー	○
	28	ー	ー	Smoker	3	<2	No	ー	ー	◆	ー	ー	ー	○	○
	29	ー	ー	Smoker	4	<2	No	ー	ー	ー	ー	○	○	○	●
	30	ー	ー	Smoker, CKD	7	2-9	No	ー	ー	ー	ー	ー	ー	ー	○	Arrhythmia● , Paroxysmal atrial fibrillation●
	31	ー	Hypoglycemic drug, Antihypertensive drug	Smoker, HT, HL, DM	5	2-9	No	ー	ー	ー	ー	○	ー	○	○	Cerebral infarction◆
	32	ー	ー	Smoker	4	<2	No	ー	ー	ー	ー	○	ー	ー	○
	33	ー	ー	Smoker	7	>9	No	ー	ー	ー	ー	ー	○	○	○
	34	ー	ー	ー	1	<2	No	ー	ー	ー	ー	ー	ー	ー	ー
	35	ー	ー	Smoker	3	<2	No	ー	ー	ー	ー	ー	ー	○	ー
	36	ー	ー	Smoker	6	2-9	No	ー	ー	ー	ー	○	ー	○	ー
	37	ー	Antihypertensive drug	HT	4	<2	No	ー	ー	ー	ー	○	○	○	ー
	38	ECG abnormalities	Hypoglycemic drug	Smoker, CKD	17	>9	No	ー	ー	ー	ー	ー	○	○	●
	39	Chemical ionization	Antiplatelet drug, Antihypertensive drug	Smoker	14	>9	No	ー	ー	ー	ー	○	○	○	○	Myocardial infarction●
	40	ー	ー	HL	5	2-9	No	ー	ー	ー	○	ー	ー	ー	ー
	41	ー	Antihypertensive drug	Smoker, HT, CKD	18	2-9	No	ー	○	◆	○	○	○	○	●	Angina pectoris●
	42	ECG abnormalities	ー	Smoker, CKD	15	2-9	No	ー	ー	ー	○	ー	○	○	ー	Cerebral infarction●
	43	MI, Increased CTR	Antiplatelet drug, Antihypertensive drug	Smoker, HT, CKD	9	<2	No	ー	○	ー	ー	ー	○	ー	ー
	44	ー	ー	Smoker	4	2-9	No	ー	ー	ー	ー	ー	ー	ー	○
	45	ー	Antihypertensive drug	Smoker, HT	7	2-9	No	ー	ー	ー	ー	ー	○	ー	○
	46	ー	ー	Smoker	6	2-9	No	ー	ー	ー	ー	ー	ー	ー	ー
	47	Increased CTR	ー	ー	1	<2	No	ー	ー	ー	ー	ー	○	ー	ー
	48	ECG abnormalities, HT, High BNP levels	ー	Smoker, HT	9	2-9	Yes	ー	○	▼	ー	○	○	○	●
	49	ー	ー	Smoker	3	<2	No	ー	ー	ー	○	ー	ー	ー	ー
	50	ー	ー	HT	8	2-9	No	ー	ー	ー	ー	ー	ー	ー	ー
	51	ー	ー	Smoker	3	<2	No	ー	ー	ー	ー	ー	○	ー	ー
	52	ー	ー	Smoker	6	2-9	No	ー	ー	ー	ー	ー	ー	ー	ー
	53	ー	ー	ー	1	<2	No	ー	ー	ー	ー	ー	ー	ー	ー
	54	ー	Lipid-lowering drug	Smoker, HL	4	2-9	No	ー	ー	ー	ー	○	ー	ー	ー
	55	ー	Lipid-lowering drug, Antihypertensive drug	HL, HT	2	<2	No	ー	ー	ー	ー	ー	ー	ー	ー
	56	ー	ー	ー	1	<2	No	ー	ー	ー	ー	ー	ー	ー	ー
	57	ー	ー	ー	1	<2	No	ー	ー	ー	ー	ー	ー	ー	ー
	58	ー	ー	ー	2	<2	No	ー	ー	ー	ー	ー	ー	ー	○
	59	Arrhythmia, UCG abnormalities	Antihypertensive drug	Smoker, HT	13	2-9	No	ー	ー	ー	ー	ー	ー	○	ー
	60	ー	ー	Smoker, HL	3	<2	No	ー	ー	ー	ー	ー	ー	ー	ー
	61	ECG abnormalities, HT	Antihypertensive drug	ー	33	>9	No	ー	ー	ー	ー	ー	ー	○	ー
	62	HT	Antihypertensive drug	Smoker, HT	18	>9	No	ー	ー	ー	ー	ー	ー	ー	○
	63	UCG abnormalities	ー	Smoker	6	2-9	No	ー	ー	ー	ー	ー	ー	ー	ー
	UPN, unique patient number; TKIs, tyrosine kinase inhibitor; BNP, plasma brain natriuretic peptide; PE, pleural effusion; TRPG, transtricuspid pressure gradient; UCG, ultrasound cardiography; CTR, cardiothoracic ratio; ECG, electrocardiogram; HT, hypertension; CVE, cardiovascular event; DM, diabetes mellitus; CKD, chronic kidney disease; HL, hyperlipidemic
	The following symbols were used to represent the patient status: ◆, patients who required TKI switching because of CVE onset; ▼, patients with reduced TKI dose because of CVEs; ●, patients who experienced CVE that required intervention but continued the same TKI at the same dosage; ○, patients who experienced a CVE that did not require intervention and continued the same TKI at the same dosage; a…
