# Supplementary material for: Impact of TKI Switching, Reduction, and Discontinuation on Cardiovascular Events in cml patients
Source: Research Square preprint supplement (doi:10.21203/rs.3.rs-3632503/v1), 2023-11-26
Supplement: Supplementary file 3 [file 8708a7e6ee329556657cfc7d.xlsx]

## Sheet: Table3
	Table 3. Assessment of CVE risk in individual 63 cases before initiating TKIs and details of the cardiovascular event under TKI treatment
	A-1. Estimate 10-year risk of Cardiovascular disease.								A-2. Score2 and Score2-OP Risk Chart (%)					B. Results of cardiovascular examination
	UPN	Score2 and Score2-OP Risk Chart (%)	Suita Score(%)		UPN	Score2 and Score2-OP Risk Chart (%)	Suita Score(%)			< 50 years	50-69 years	70 ≦ years			Total number of patients	Age at incidence of CVE	Duration of onset of CVE from initiating TKI	Risk of CVE
	1	2	<2		31	5	2-9		Low	< 2.5%	< 5%	< 7.5%						low	intermediate	high
	2	3	<2		32	4	<2		Intermediate	2.5% to < 5%	5% to < 7.5%	7.5% to < 15%		Hypertension	32 (66)	70 (27-84)	85 (1-263)	3 (33)	14 (50)	14 (82)
	3	3	<2		33	7	>9		High	≧ 5%	≧ 10%	≧ 15%		BNP (> 100 pg/ml)	8 (17)	75 (62-84)	35 (2-165)	0	5 (18)	3 (18)
	4	5	<2		34	1	<2							CTR (> 50 %)	19 (40)	67 (30-83)	57 (1-184)	2 (22)	5 (18)	12 (71)
	5	11	2-9		35	3	<2							Pleural effusion	10 (19)	67 (34-83)	15 (1-107)	2 (22)	4 (14)	3 (18)
	6	5	2-9		36	6	2-9		A-3. Suita score (%)					QTc prolongation (> 500 ms)	0	0	0	0		0
	7	15	>9		37	4	<2							ECG abnormalities	30 (57)	67 (29-80)	66 (1-262)	4 (44)	11 (39)	12 (71)
	8	3	<2		38	17	>9		Low	< 2%				TRPG (> 30 mmHg)	10 (23)	74 (34-84)	63 (8-185)	2 (22)	4 (14)	4 (24)
	9	3	<2		39	14	>9		Intermediate	2% to < 9%				UCG abnormalities	15 (32)	67 (34-83)	67 (1-172)	2 (22)	7 (25)	6 (35)
	10	5	<2		40	5	2-9		High	≧ 9%				TKI, tyrosine kinase inhibitor; TRPG, transtricuspid pressure gradient; UCG, ultrasound cardiography; CTR, cardiothoracic ratio; BNP, plasma brain natriuretic peptide; ECG, electrocardiogram
	11	10	>9		41	18	2-9
	12	12	>9		42	15	2-9
	13	7	2-9		43	9	<2							C. Severity of cardiovascular events by patient background
	14	3	<2		44	4	2-9
	15	7	2-9		45	7	2-9									CVE		Non-CVE	Total
	16	11	2-9		46	6	2-9									Mild*	Severe	(n=12)	(n=63)
	17	5	<2		47	1	<2									(n=42)	(n=9)
	18	9	<2		48	9	2-9							Age (years)
	19	3	<2		49	3	<2								Male	58 (19-85)	66 (27-78)	38 (28-70)	55 (19-86)
	20	2	<2		50	8	2-9								Female	58 (40-75)	63	64 (32-72)	62 (32-75)
	21	6	<2		51	3	<2							Duration of treatment (months)
	22	9	>9		52	6	2-9								Male	96 (2-279)	150 (6-254)	19 (2-144)	64 (2-279)
	23	18	>9		53	1	<2								Female	78 (36-301)	208	17 (8-222)	64 (2-279)
	24	16	>9		54	4	2-9							*including abnormal ECG and UCG findings
	25	7	2-9		55	2	<2
	26	4	2-9		56	1	<2
	27	1	<2		57	1	<2
	28	3	<2		58	2	<2
	29	4	<2		59	13	2-9
	30	7	2-9		60	3	<2
					61	33	>9
					62	18	>9
					63	6	2-9
